# Supplementary material for: Three New Alien Taxa for Europe and a Chorological Update on the Alien Vascular Flora of Calabria (Southern Italy)
Source: Plants (Basel). 2020 Sep 11;9(9):1181. doi: 10.3390/plants9091181 (PMC7569777; doi:10.3390/plants9091181)
Supplement: Supplementary file 1 [file plants-09-01181-s001.xlsx]

## Sheet: Table S1
Table S1. Detailed list of the 118 records of the 34 alien taxa recorded to Calabria (Southern Italy, Europe), including for each taxon: Current status of invasiveness, Reporting status (confirmation, new for the region...), References for data check, Legit, Determinavit, X UTM 33, Y UTM 33, Latitude, Longitude, Altitude (m a.s.l.), Date, Locality, Municipality, Province, Habitat, Habitat (simpli…
ID	Taxon	Current status of invasiviness	Reporting status (confirmation, new for the region...)	References for data check	Legit	Determinavit	X UTM 33	Y UTM 33	Latitude	Longitude	Altitude m a.s.l.	Date	Locality	Municipality	Province	Habitat	Habitat (simplified)	Herbarium (only for collected samples)
1	Allium cepa L.	CAS	new Calabria	[79]	V.L.A. Laface	V.L.A. Laface	571888.17 m E	4203765.32 m N	37.978678°	15.818553°	348	06.06.2019	Strada comunale Amendolara	San Lorenzo	RC	wheat field	Crop
2	Araujia sericifera Brot.	CAS	first geolocalized report Calabria	[79]	V.L.A. Laface	V.L.A. Laface	556907.00 m E	4225345.00 m N	38.174222°	15.649700°	25	04.07.2020	Catona	Reggio Calabria	RC	roadside climbed to a wire mesh	Roadside	REGGIO
2	Araujia sericifera Brot.	CAS	first geolocalized report Calabria	[79]	V.L.A. Laface	V.L.A. Laface	566247.23 m E	4198665.73 m N	37.933149°	15.753858°	57	29.07.2020	Loc.tà Zonzoloso, Borgata Musa	Melito di Porto Salvo	RC	roadside climbed to a wire mesh	Roadside	REGGIO
3	Asparagus setaceus (Kunth) Jessop	CAS	new Calabria	[79]	V.L.A. Laface	V.L.A. Laface	555651.07 m E	4228572.61 m N	38.203382°	15.635614°	7	02.03.2020	Bolano, tra Catona e Villa S.Giovanni	Reggio Calabria	RC	citrus grove abandoned for many years	Uncultivated field	REGGIO
3	Asparagus setaceus (Kunth) Jessop	CAS	new Calabria	[79]	V.L.A. Laface	V.L.A. Laface	556935.40 m E	4224281.09 m N	38.164632°	15.649939°	9	03.03.2020	Gallico Inferiore	Reggio Calabria	RC	abandoned citrus grove	Uncultivated field	REGGIO
3	Asparagus setaceus (Kunth) Jessop	CAS	new Calabria	[79]	V.L.A. Laface	V.L.A. Laface	556606.49 m E	4226585.03 m N	38.185416°	15.646368°	16	04.03.2020	Catona (Via Feudo)	Reggio Calabria	RC	climbed to a wire mesh	Uncultivated field	REGGIO
3	Asparagus setaceus (Kunth) Jessop	CAS	new Calabria	[79]	V.L.A. Laface	V.L.A. Laface	556280.68 m E	4226977.46 m N	38.188973°	15.642679°	37	11.05.2020	Catona	Reggio Calabria	RC	climbed to a wire mesh	Uncultivated field	REGGIO
3	Asparagus setaceus (Kunth) Jessop	CAS	new Calabria	[79]	V.L.A. Laface	V.L.A. Laface	557222.44 m E	4224438.33 m N	38.166028°	15.653223°	16	03.03.2020	Gallico Inferiore	Reggio Calabria	RC	uncultivated garden	Uncultivated field
4	Bassia scoparia (L.) Voss	CAS	new Calabria	[79]	C.M. Musarella	C.M. Musarella	557598.67 m E	4209007.74 m N	38.026944°	15.656278°	16	21.10.2019	Via Torrente Carrò e Quattrone, Pellaro	Reggio Calabria	RC	Roadside	Roadside	REGGIO
5	Beta vulgaris L. subsp. vulgaris	NAT	new Calabria	[79]	V.L.A. Laface	V.L.A. Laface	562169.24 m E	4222469.25 m N	38.147958°	15.709523°	604	28.02.2020	Ortì Inferiore	Reggio Calabria	RC	orchard	Crop	REGGIO
5	Beta vulgaris L. subsp. vulgaris	NAT	new Calabria	[79]	V.L.A. Laface	V.L.A. Laface	573821.01 m E	4197939.55 m N	37.926021°	15.839961°	17	09.02.2020	C.da Pellegrino, Fiumara Acrifa	San Lorenzo	RC	bergamot grove	Crop
5	Beta vulgaris L. subsp. vulgaris	NAT	new Calabria	[79]	V.L.A. Laface	V.L.A. Laface	578523.72 m E	4198763.43 m N	37.933048°	15.893546°	17	09.02.2020	Bova Marina, Fiumara Amendolea	Bova	RC	bergamot grove	Crop
5	Beta vulgaris L. subsp. vulgaris	NAT	new Calabria	[79]	V.L.A. Laface	V.L.A. Laface	566241.34 m E	4200984.31 m N	37.954042°	15.754001°	230	26.01.2020	Via Provinciale Sant'Elia-Montebello Jonico	Montebello Jonico	RC	Roadside	Roadside
5	Beta vulgaris L. subsp. vulgaris	NAT	new Calabria	[79]	V.L.A. Laface	V.L.A. Laface	569555.44 m E	4233714.32 m N	38.248756°	15.794914°	653	10.06.2019	Solano	Scilla	RC	Roadside	Roadside
5	Beta vulgaris L. subsp. vulgaris	NAT	new Calabria	[79]	V.L.A. Laface	V.L.A. Laface	571736.17 m E	4206322.46 m N	38.001735°	15.817078°	329	19.01.2020	San Fantino	San Lorenzo	RC	uncultivated field	Uncultivated field
5	Beta vulgaris L. subsp. vulgaris	NAT	new Calabria	[79]	V.L.A. Laface	V.L.A. Laface	572986.47 m E	4204961.52 m N	37.989366°	15.831174°	544	22.01.2020	San Pantaleone Loc.tà Varada	San Lorenzo	RC	uncultivated field	Uncultivated field
6	Bidens formosa (Bonato) Sch.Bip.	CAS	new Calabria	[79]	V.L.A. Laface	V.L.A. Laface	556581.51 m E	4227265.28 m N	38.191548°	15.646137°	25	29.02.2020	Loc.tà Cazzeria, Catona	Reggio Calabria	RC	Roadside	Roadside	REGGIO
6	Bidens formosa (Bonato) Sch.Bip.	CAS	new Calabria	[79]	V.L.A. Laface	V.L.A. Laface	556705.00 m E	4227337.00 m N	38.192187°	15.647553°	28	29.02.2020	Loc.tà Cazzeria, Catona (nei pressi del ponte dell'autostrada A3)	Reggio Calabria	RC	Roadside	Roadside	REGGIO
7	Brugmansia aurea Lagerh.	CAS	new Italy	[7,83,84,91,92]	V.L.A. Laface	V.L.A. Laface	593992.86 m E	4198918.38 m N	37.932976°	16.069568°	8	11.01.2020	Frazione di Galati S.S.106	Brancaleone	RC	Roadside	Roadside	REGGIO
8	Cascabela thevetia (L.) Lippold	CAS	new Europe	[77,78,90-92]	V.L.A. Laface	V.L.A. Laface	570558.78 m E	4197289.64 m N	37.920423°	15.802782°	9	05.10.2019	Melito di Porto Salvo	Melito di Porto Salvo	RC	water drainage	Temporary water body	REGGIO
8	Cascabela thevetia (L.) Lippold	CAS	new Europe	[77,78,83-84,90-92]	V.L.A. Laface	V.L.A. Laface	573789.00 m E	4197326.00 m N	37.920494°	15.839534°	9	19.10.2019	Fiumara Acrifa	Condofuri	RC	near a Fiumara	Temporary water body	REGGIO
9	Casuarina equisetifolia L.	CAS	new Calabria	[79]	V.L.A. Laface	V.L.A. Laface	557407.22 m E	4218832.40 m N	38.115494°	15.654883°	35	29.12.2019	Reggio Calabria (incrocio Via Aschenez-Via Willermin)	Reggio Calabria	RC	wall	Wall
9	Casuarina equisetifolia L.	CAS	new Calabria	[79]	V.L.A. Laface	V.L.A. Laface	574212.00 m E	4197683.40 m N	37.923677°	15.844383°	19	18.01.2019	Straci, Marina di San Lorenzo	San Lorenzo	RC	wall of a traditional water collection tank ("gebbia")	Wall
10	Cedrus atlantica (Endl.) G.Manetti ex Carrière	CAS	new Calabria	[79]	V.L.A. Laface	V.L.A. Laface	572589.34 m E	4225033.68 m N	38.170283°	15.828692°	1211	06.05.2019	S.S.184	Santo Stefano in Aspromonte	RC	roadside and beech wood	Shrubland
10	Cedrus atlantica (Endl.) G.Manetti ex Carrière	CAS	new Calabria	[79]	V.L.A. Laface	V.L.A. Laface	570407.05 m E	4222265.14 m N	38.145513°	15.803511°	1163	09.05.2020	Piani di Reggio	Reggio Calabria	RC	slope	Shrubland
11	Cenchrus setaceus (Forssk.) Morrone	INV	change of status Calabria	[79]	C.M. Musarella	C.M. Musarella	557566.00 m E	4210865.68 m N	38.043684°	15.656055°	6	15.02.2020	Occhio di Pellaro	Reggio Calabria	RC	Roadside	Roadside	REGGIO
11	Cenchrus setaceus (Forssk.) Morrone	INV	change of status Calabria	[79]	C.M. Musarella	C.M. Musarella	558134.56 m E	4213163.56 m N	38.064363°	15.662721°	40	08.05.2020	S.S. 106	Reggio Calabria	RC	Roadside	Roadside	REGGIO
11	Cenchrus setaceus (Forssk.) Morrone	INV	change of status Calabria	[79]	V.L.A. Laface	V.L.A. Laface	561813.47 m E	4199845.37 m N	37.944089°	15.703504°	11	17.05.2020	Saline	Reggio Calabria	RC	Roadside	Roadside	REGGIO
11	Cenchrus setaceus (Forssk.) Morrone	INV	change of status Calabria	[79]	V.L.A. Laface	V.L.A. Laface	582799.20 m E	4199276.85 m N	37.937291°	15.942257°	144	05.10.2019	C.da Venturi	Bova	RC	Roadside	Roadside	REGGIO
11	Cenchrus setaceus (Forssk.) Morrone	INV	change of status Calabria	[79]	V.L.A. Laface	V.L.A. Laface	583220.09 m E	4201092.86 m N	37.953626°	15.947259°	230	05.10.2019	Scilindermeno	Bova	RC	Roadside	Roadside	REGGIO
11	Cenchrus setaceus (Forssk.) Morrone	INV	change of status Calabria	[79]	V.L.A. Laface	V.L.A. Laface	583253.97 m E	4202741.24 m N	37.968476°	15.947824°	398	05.10.2019	Coddurena	Bova	RC	Roadside	Roadside	REGGIO
12	Chlorophytum comosum (Thunb.) Jacques	CAS	new Calabria	[79]	V.L.A. Laface	V.L.A. Laface	562359.57 m E	4222411.57 m N	38.147425°	15.711690°	608	22.02.2020	Loc.tà Santa Maria, Ortì Inferiore	Reggio Calabria	RC	water drainage channel	Temporary water body	REGGIO
12	Chlorophytum comosum (Thunb.) Jacques	CAS	new Calabria	[79]	V.L.A. Laface	V.L.A. Laface	562321.70 m E	4222383.87 m N	38.147170°	15.711247°	598	22.02.2020	Loc.tà Santa Maria, Ortì Inferiore	Reggio Calabria	RC	rushes in an abandoned field	Temporary water body	REGGIO
13	Cucurbita maxima Duchesne subsp. maxima	CAS	new Calabria	[79]	V.L.A. Laface	V.L.A. Laface	562279.89 m E	4222425.90 m N	38.147552°	15.710772°	604	06.06.2019	Ortì Inferiore	Reggio Calabria	RC	water drainage channel	Temporary water body
13	Cucurbita maxima Duchesne subsp. maxima	CAS	new Calabria	[79]	V.L.A. Laface	V.L.A. Laface	560860.79 m E	4225906.32 m N	38.179022°	15.694885°	297	23.07.2019	Sambatello	Reggio Calabria	RC	Roadside	Roadside
14	Dolichandra unguis-cati (L.) L.G.Lohmann	CAS	new Calabria	[79]	V.L.A. Laface	V.L.A. Laface	579876.15 m E	4198359.02 m N	37.929289°	15.908896°	9	26.01.2020	Località Vena Bova Marina	Bova	RC	climbing among the bricks of a bridge and in a water drainage channel	Temporary water body	REGGIO
14	Dolichandra unguis-cati (L.) L.G.Lohmann	CAS	new Calabria	[79]	V.L.A. Laface	V.L.A. Laface	557839.02 m E	4222317.00 m N	38.146874°	15.660094°	28	04.07.2019	Gallico	Reggio Calabria	RC	ruins	Ruins	REGGIO
14	Dolichandra unguis-cati (L.) L.G.Lohmann	CAS	new Calabria	[79]	V.L.A. Laface	V.L.A. Laface	580447.69 m E	4198490.84 m N	37.930419°	15.915407°	9	26.01.2020	Bova Marina	Bova	RC	climbed to a wire mesh and ruins	Ruins	REGGIO
15	Fagopyrum esculentum Moench	CAS	new Calabria	[79]	V.L.A. Laface	V.L.A. Laface	566253.16 m E	4229035.70 m N	38.206843°	15.756740°	388	05.05.2019	Lucia	Laganadi	RC	Roadside	Roadside	REGGIO
16	Freesia alba (G.L.Mey.) Gumbl.	CAS	new Calabria	[79]	V.L.A. Laface	V.L.A. Laface	557214.19 m E	4218061.30 m N	38.108561°	15.652622°	82	09.02.2020	Reggio Calabria (Loc. Trabocchetto)	Reggio Calabria	RC	Tettoia con impluvio per le acque di scolo	Ruins
16	Freesia alba (G.L.Mey.) Gumbl.	CAS	new Calabria	[79]	V.L.A. Laface	V.L.A. Laface	558796.20 m E	4228454.01 m N	38.202119°	15.671522°	94	02.03.2020	Rosalì (Loc. San Cono)	Reggio Calabria	RC	drywall limiting a "Fiumara"	Wall	REGGIO
16	Freesia alba (G.L.Mey.) Gumbl.	CAS	new Calabria	[79]	V.L.A. Laface	V.L.A. Laface	564088.66 m E	4222831.37 m N	38.151084°	15.731452°	668	04.03.2020	Ortì Superiore	Reggio Calabria	RC	Roadside	Roadside	REGGIO
17	Ipomoea setosa Ker-Gawl. subsp. pavonii (Hallier f.) J.R.I. Wood & Scotland	CAS	new Europe	[77,85]	S. Cannavò	S. Cannavò, V.L.A. Laface, C. M. Musarella, G. Spampinato	584492.98 m E	4252696.94 m N	38.418530°	15.967880°	81	18.10.2019	C.da La Monaca	Rizziconi	RC	Roadside	Roadside	REGGIO
18	Juglans regia L.	CAS	new Calabria	[79]	V.L.A. Laface	V.L.A. Laface	566049.73 m E	4229179.41 m N	38.208153°	15.754430°	374	14.03.2020	San Roberto nella Fiumara Catona	San Roberto	RC	riverbed	Temporary water body	REGGIO
18	Juglans regia L.	CAS	new Calabria	[79]	D. Grande	C.M. Musarella	630135.10 m E	4320533.49 m N	39.024162°	16.503332°	885	16.02.2020	Cicala	Catanzaro	CZ	Roadside	Roadside	REGGIO
18	Juglans regia L.	CAS	new Calabria	[79]	V.L.A. Laface	V.L.A. Laface	565632.67 m E	4229159.12 m N	38.208000°	15.749657°	349	09.05.2020	San Roberto	San Roberto	RC	Roadside	Roadside	REGGIO
18	Juglans regia L.	CAS	new Calabria	[79]	V.L.A. Laface	V.L.A. Laface	564536.00 m E	4232455.00 m N	38.237782°	15.737439°	600	25.05.2020	Villaggio del Pino	Melia di Scilla	RC	Roadside	Roadside	REGGIO
18	Juglans regia L.	CAS	new Calabria	[79]	V.L.A. Laface	V.L.A. Laface	569788.03 m E	4234040.01 m N	38.251673°	15.797604°	601	25.05.2020	Solano	Bagnara Calabra	RC	Roadside	Roadside	REGGIO
19	Kalanchoë delagoënsis Eckl. & Zeyh.	CAS	new Calabria	[79]	C.M. Musarella	C.M. Musarella	556923.98 m E	4208428.46 m N	38.021766°	15.648545°	15	15.02.2020	Pellaro (Via Sottolume)	Reggio Calabria	RC	Roadside	Roadside	REGGIO
20	Luffa aegyptiaca Mill.	CAS	new Calabria and Italian Peninsula	[79]	V.L.A. Laface	V.L.A. Laface	573807.30 m E	4197337.41 m N	37.920592°	15.839740°	9	19.10.2019	Fiumara Acrifa	Condofuri	RC	riverbed	Temporary water body	REGGIO
21	Narcissus 'Cotinga'	NAT	new Italy	[60]	V.L.A. Laface	C.M. Musarella	568375.73 m E	4224365.34 m N	38.164593°	15.780524°	543	14.03.2020	Podargoni	Reggio Calabria	RC	abandoned walnut grove	Crop	REGGIO
21	Narcissus 'Cotinga'	NAT	new Italy	[60]	V.L.A. Laface	C.M. Musarella	572166.06 m E	4221262.56 m N	38.136339°	15.823482°	1313	27.04.2019	Piani di Reggio	Reggio Calabria	RC	grazing-meadow covered with broom	Shrubland	REGGIO
22	Narcissus 'Erlicheer'	CAS	new Italy	[60]	C.M. Musarella	C.M. Musarella	557666.00 m E	4209059.00 m N	38.027402°	15.657049°	18	24.01.2020	Via Torrente Carrò e Quattrone, Pellaro	Reggio Calabria	RC	Roadside	Roadside	REGGIO
23	Nothoscordum gracile (Aiton) Stearn	INV	change of status Calabria	[79]	V.L.A. Laface	V.L.A. Laface	558083.66 m E	4223324.84 m N	38.155941°	15.662968°	34	05.03.2020	Archi Carmine	Reggio Calabria	RC	Roadside	Roadside	REGGIO
23	Nothoscordum gracile (Aiton) Stearn	INV	change of status Calabria	[79]	V.L.A. Laface	V.L.A. Laface	563212.38 m E	4218068.61 m N	38.108221°	15.721033°	535	24.11.2019	Pavigliana	Reggio Calabria	RC	Roadside	Roadside
23	Nothoscordum gracile (Aiton) Stearn	INV	change of status Calabria	[79]	V.L.A. Laface	V.L.A. Laface	556104.53 m E	4226867.27 m N	38.187991°	15.640659°	9	09.05.2020	Catona (Via Mercato)	Reggio Calabria	RC	Roadside	Roadside	REGGIO
23	Nothoscordum gracile (Aiton) Stearn	INV	change of status Calabria	[79]	V.L.A. Laface	V.L.A. Laface	555989.60 m E	4226707.27 m N	38.186554°	15.639327°	5	09.05.2020	Catona (Via Mercato)	Reggio Calabria	RC	Roadside	Roadside	REGGIO
23	Nothoscordum gracile (Aiton) Stearn	INV	change of status Calabria	[79]	V.L.A. Laface	V.L.A. Laface	555917.08 m E	4226605.00 m N	38.185641°	15.638498°	3	09.05.2020	Catona (Via Mercato)	Reggio Calabria	RC	Roadside	Roadside	REGGIO
23	Nothoscordum gracile (Aiton) Stearn	INV	change of status Calabria	[79]	V.L.A. Laface	V.L.A. Laface	556067.34 m E	4226262.21 m N	38.182539°	15.640183°	1	09.05.2020	Catona (Via Marina)	Reggio Calabria	RC	Roadside	Roadside	REGGIO
23	Nothoscordum gracile (Aiton) Stearn	INV	change of status Calabria	[79]	V.L.A. Laface	V.L.A. Laface	556060.14 m E	4225229.50 m N	38.173234°	15.640023°	1	09.05.2020	Catona (Via Marina)	Reggio Calabria	RC	Roadside	Roadside	REGGIO
23	Nothoscordum gracile (Aiton) Stearn	INV	change of status Calabria	[79]	V.L.A. Laface	V.L.A. Laface	556695.25 m E	4226135.50 m N	38.181355°	15.647343°	23	10.05.2020	Località San Francesco, Catona	Reggio Calabria	RC	Roadside	Roadside	REGGIO
23	Nothoscordum gracile (Aiton) Stearn	INV	change of status Calabria	[79]	V.L.A. Laface	V.L.A. Laface	557035.03 m E	4225124.99 m N	38.172231°	15.651144°	34	10.05.2020	Gallico Inferiore (Via Nazionale)	Reggio Calabria	RC	Roadside	Roadside	REGGIO
23	Nothoscordum gracile (Aiton) Stearn	INV	change of status Calabria	[79]	V.L.A. Laface	V.L.A. Laface	557040.43 m E	4225108.02 m N	38.172078°	15.651199°	23	10.05.2020	Gallico Inferiore (Via Nazionale)	Reggio Calabria	RC	Roadside	Roadside	REGGIO
23	Nothoscordum gracile (Aiton) Stearn	INV	change of status Calabria	[79]	V.L.A. Laface	V.L.A. Laface	557082.32 m E	4224853.80 m N	38.169784°	15.651662°	18	10.05.2020	Località S.Antonino, Gallico Inferiore	Reggio Calabria	RC	Roadside	Roadside	REGGIO
23	Nothoscordum gracile (Aiton) Stearn	INV	change of status Calabria	[79]	V.L.A. Laface	V.L.A. Laface	557201.99 m E	4224630.88 m N	38.167760°	15.652999°	19	10.05.2020	Gallico Inferiore (Via Nazionale)	Reggio Calabria	RC	roadside and wall	Roadside	REGGIO
23	Nothoscordum gracile (Aiton) Stearn	INV	change of status Calabria	[79]	V.L.A. Laface	V.L.A. Laface	557303.96 m E	4224243.73 m N	38.164272°	15.654143°	15	10.05.2020	Ponte Itria, Gallico Inferiore	Reggio Calabria	RC	Roadside	Roadside	REGGIO
23	Nothoscordum gracile (Aiton) Stearn	INV	change of status Calabria	[79]	V.L.A. Laface	V.L.A. Laface	557503.31 m E	4223606.45 m N	38.158512°	15.656363°	15	10.05.2020	Gallico Inferiore (Via Nazionale)	Reggio Calabria	RC	Roadside	Roadside	REGGIO
23	Nothoscordum gracile (Aiton) Stearn	INV	change of status Calabria	[79]	V.L.A. Laface	V.L.A. Laface	557868.86 m E	4223392.36 m N	38.156560°	15.660512°	26	10.05.2020	Scaccioti, Archi	Reggio Calabria	RC	Roadside	Roadside	REGGIO
23	Nothoscordum gracile (Aiton) Stearn	INV	change of status Calabria	[79]	V.L.A. Laface	V.L.A. Laface	557604.98 m E	4229942.81 m N	38.215613°	15.658041°	139	10.05.2020	Campo Calabro	Campo Calabro	RC	Roadside	Roadside	REGGIO
23	Nothoscordum gracile (Aiton) Stearn	INV	change of status Calabria	[79]	V.L.A. Laface	V.L.A. Laface	557507.76 m E	4229900.77 m N	38.215233°	15.656918°	142	10.05.2020	Campo Calabro	Campo Calabro	RC	Roadside	Roadside	REGGIO
23	Nothoscordum gracile (Aiton) Stearn	INV	change of status Calabria	[79]	V.L.A. Laface	V.L.A. Laface	556178.73 m E	4227471.87 m N	38.193435°	15.641554°	30	10.05.2020	Concessa	Reggio Calabria	RC	Roadside	Roadside	REGGIO
23	Nothoscordum gracile (Aiton) Stearn	INV	change of status Calabria	[79]	V.L.A. Laface	V.L.A. Laface	556148.66 m E	4227393.30 m N	38.192726°	15.641197°	33	10.05.2020	Concessa	Reggio Calabria	RC	Roadside	Roadside	REGGIO
23	Nothoscordum gracile (Aiton) Stearn	INV	change of status Calabria	[79]	V.L.A. Laface	V.L.A. Laface	556130.00 m E	4227345.00 m N	38.192295°	15.640988°	24	10.05.2020	Concessa	Reggio Calabria	RC	Roadside	Roadside	REGGIO
23	Nothoscordum gracile (Aiton) Stearn	INV	change of status Calabria	[79]	V.L.A. Laface	V.L.A. Laface	556125.66 m E	4227320.26 m N	38.192072°	15.640936°	22	10.05.2020	Concessa	Reggio Calabria	RC	Roadside	Roadside	REGGIO
23	Nothoscordum gracile (Aiton) Stearn	INV	change of status Calabria	[79]	V.L.A. Laface	V.L.A. Laface	555923.14 m E	4229870.08 m N	38.215063°	15.638823°	27	10.05.2020	Villa San Giovanni	Villa San Giovanni	RC	Roadside	Roadside	REGGIO
23	Nothoscordum gracile (Aiton) Stearn	INV	change of status Calabria	[79]	C.M. Musarella	C.M. Musarella	558319.51 m E	4203192.92 m N	37.974493°	15.664018°	17	08.05.2020	Lazzaro	Motta San Giovanni	RC	Roadside	Roadside	REGGIO
23	Nothoscordum gracile (Aiton) Stearn	INV	change of status Calabria	[79]	C.M. Musarella	C.M. Musarella	558339.84 m E	4203199.20 m N	37.974547°	15.664240°	18	08.05.2020	Lazzaro	Motta San Giovanni	RC	Roadside	Roadside	REGGIO
23	Nothoscordum gracile (Aiton) Stearn	INV	change of status Calabria	[79]	C.M. Musarella	C.M. Musarella	558396.88 m E	4203146.31 m N	37.974068°	15.664895°	17	08.05.2020	Lazzaro	Motta San Giovanni	RC	Roadside	Roadside	REGGIO
23	Nothoscordum gracile (Aiton) Stearn	INV	change of status Calabria	[79]	C.M. Musarella	C.M. Musarella	558406.60 m E	4203163.19 m N	37.974218°	15.665000°	18	08.05.2020	Lazzaro	Motta San Giovanni	RC	Roadside	Roadside	REGGIO
23	Nothoscordum gracile (Aiton) Stearn	INV	change of status Calabria	[79]	V.L.A. Laface	V.L.A. Laface	555760.00 m E	4229679.00 m N	38.213352°	15.636946°	10	13.05.2020	Viale Umberto Zanotti Bianco,Villa San Giovanni	Villa San Giovanni	RC	Roadside	Roadside	REGGIO
23	Nothoscordum gracile (Aiton) Stearn	INV	change of status Calabria	[79]	V.L.A. Laface	V.L.A. Laface	555775.97 m E	4229614.00 m N	38.212765°	15.637123°	9	13.05.2020	Viale Umberto Zanotti Bianco,Villa San Giovanni	Villa San Giovanni	RC	Roadside	Roadside	REGGIO
23	Nothoscordum gracile (Aiton) Stearn	INV	change of status Calabria	[79]	V.L.A. Laface	V.L.A. Laface	555674.00 m E	4229168.00 m N	38.208752°	15.635923°	9	13.05.2020	Acciarello, Villa San Giovanni	Villa San Giovanni	RC	Roadside	Roadside	REGGIO
23	Nothoscordum gracile (Aiton) Stearn	INV	change of status Calabria	[79]	V.L.A. Laface	V.L.A. Laface	555674.03 m E	4228853.98 m N	38.205922°	15.635899°	5	13.05.2020	Bolano, tra Catona e Villa S.Giovanni	Villa San Giovanni	RC	Roadside	Roadside	REGGIO
23	Nothoscordum gracile (Aiton) Stearn	INV	change of status Calabria	[79]	V.L.A. Laface	V.L.A. Laface	555773.00 m E	4227392.00 m N	38.192740°	15.636915°	11	13.05.2020	Spontone, Catona	Reggio Calabria	RC	Roadside	Roadside	REGGIO
23	Nothoscordum gracile (Aiton) Stearn	INV	change of status Calabria	[79]	V.L.A. Laface	V.L.A. Laface	560452.22 m E	4225783.42 m N	38.177942°	15.690210°	270	13.05.2020	Sambatello	Reggio Calabria	RC	Roadside	Roadside	REGGIO
23	Nothoscordum gracile (Aiton) Stearn	INV	change of status Calabria	[79]	V.L.A. Laface	V.L.A. Laface	557869.32 m E	4219450.40 m N	38.121038°	15.660207°	59	09.12.2019	Cittadella Universitaria di Reggio Calabria	Reggio Calabria	RC	Sidewalk	Sidewalk	REGGIO
23	Nothoscordum gracile (Aiton) Stearn	INV	change of status Calabria	[79]	V.L.A. Laface	V.L.A. Laface	557608.84 m E	4219492.26 m N	38.121430°	15.657229°	31	22.01.2020	Reggio Calabria	Reggio Calabria	RC	Sidewalk	Sidewalk	REGGIO
23	Nothoscordum gracile (Aiton) Stearn	INV	change of status Calabria	[79]	V.L.A. Laface	V.L.A. Laface	557457.46 m E	4219642.00 m N	38.122791°	15.655524°	24	13.12.2019	Santa Caterina	Reggio Calabria	RC	Sidewalk	Sidewalk
23	Nothoscordum gracile (Aiton) Stearn	INV	change of status Calabria	[79]	V.L.A. Laface	V.L.A. Laface	555765.73 m E	4229817.22 m N	38.214597°	15.637022°	8	13.05.2020	Viale Umberto Zanotti Bianco (Villa San Giovanni)	Villa San Giovanni	RC	Sidewalk	Sidewalk
24	Oxalis stricta L.	CAS	confirmation Calabria region	[79]	V.L.A. Laface	V.L.A. Laface	556454.27 m E	4227088.74 m N	38.189965°	15.644670°	17	14.03.2020	Catona (Via della Fonderia)	Reggio Calabria	RC	sidewalk in a roadside	Sidewalk	REGGIO
24	Oxalis stricta L.	CAS	confirmation Calabria region	[79]	V.L.A. Laface	V.L.A. Laface	557736.17 m E	4209920.04 m N	38.035157°	15.657916°	7	04.03.2020	Occhio di Pellaro	Reggio Calabria	RC	Sidewalk	Sidewalk	REGGIO
24	Oxalis stricta L.	CAS	confirmation Calabria region	[79]	V.L.A. Laface	V.L.A. Laface	562329.20 m E	4222429.03 m N	38.147584°	15.711343°	610	28.03.2020	Ortì Inferiore	Reggio Calabria	RC	between the steps of a stairway	Sidewalk	REGGIO
25	Passiflora caerulea L.	CAS	new Calabria	[79]	V.L.A. Laface	V.L.A. Laface	592505.61 m E	4245491.44 m N	38.352809°	16.058705°	355	13.09.2019	SP1 Taurianova-Cittanova	Cittanova	RC	roadside climbed to a wire mesh	Roadside	REGGIO
26	Portulaca grandiflora Hook.	CAS	new Calabria	[79]	V.L.A. Laface	V.L.A. Laface	555937.47 m E	4226633.88 m N	38.185898°	15.638733°	4	29.07.2019	Via Mercato, Catona	Reggio Calabria	RC	Roadside	Roadside
26	Portulaca grandiflora Hook.	CAS	new Calabria	[79]	V.L.A. Laface	V.L.A. Laface	556811.82 m E	4225819.10 m N	38.178500°	15.648642°	18	25.07.2019	Via Nazionale, Catona	Reggio Calabria	RC	Sidewalk	Sidewalk
27	Prunus armeniaca L.	CAS	new Calabria	[79]	V.L.A. Laface	V.L.A. Laface	560949.97 m E	4222904.98 m N	38.151968°	15.695646°	560	04.04.2019	Piani di San Nicola, Ortì	Reggio Calabria	RC	olive grove	Crop	REGGIO
28	Prunus dulcis (Mill.) D.A.Webb	CAS	new Calabria	[79]	V.L.A. Laface	V.L.A. Laface	563506.69 m E	4214437.88 m N	38.075486°	15.724071°	491	06.02.2020	C.da Fornace, Strada Gallina-Santa Venere	Reggio Calabria	RC	near an abandoned almond grove	Shrubland
28	Prunus dulcis (Mill.) D.A.Webb	CAS	new Calabria	[79]	V.L.A. Laface	V.L.A. Laface	575946.69 m E	4199970.54 m N	37.944144°	15.864352°	173	13.09.2019	C.da Pietra, San Carlo	Condofuri Superiore	RC	rocks emerging from the ground	Outcropping rocks	REGGIO
28	Prunus dulcis (Mill.) D.A.Webb	CAS	new Calabria	[79]	V.L.A. Laface	V.L.A. Laface	575928.68 m E	4199908.11 m N	37.943588°	15.864148°	172	13.09.2019	C.da Pietra, San Carlo	Condofuri Superiore	RC	rocks emerging from the ground	Outcropping rocks	REGGIO
28	Prunus dulcis (Mill.) D.A.Webb	CAS	new Calabria	[79]	V.L.A. Laface	V.L.A. Laface	561883.15 m E	4213675.80 m N	38.068723°	15.705494°	368	06.02.2020	Aretina Superiore	Reggio Calabria	RC	Roadside	Roadside
28	Prunus dulcis (Mill.) D.A.Webb	CAS	new Calabria	[79]	V.L.A. Laface	V.L.A. Laface	559368.00 m E	4206072.00 m N	38.000372°	15.676193°	357	19.05.2020	C.da Cambareri	Motta San Giovanni	RC	Roadside	Roadside	REGGIO
28	Prunus dulcis (Mill.) D.A.Webb	CAS	new Calabria	[79]	V.L.A. Laface	V.L.A. Laface	560159.01 m E	4206009.97 m N	37.999761°	15.685197°	414	19.05.2020	Motta San Giovanni	Motta San Giovanni	RC	Roadside	Roadside	REGGIO
28	Prunus dulcis (Mill.) D.A.Webb	CAS	new Calabria	[79]	V.L.A. Laface	V.L.A. Laface	581082.70 m E	4199017.44 m N	37.935116°	15.922699°	76	13.09.2019	C.da Monte Callea	Bova	RC	uncultivated field	Shrubland	REGGIO
29	Salpichroa origanifolia (Lam.) Baill.	INV	change of status Calabria	[79]	C.M. Musarella	C.M. Musarella	557513.38 m E	4221800.55 m N	38.142236°	15.656332°	18	21.02.2020	Pentimele	Reggio Calabria	RC	roadside, climbed to a wire mesh	Roadside	REGGIO
29	Salpichroa origanifolia (Lam.) Baill.	INV	change of status Calabria	[79]	V.L.A. Laface	V.L.A. Laface	557225.16 m E	4224454.52 m N	38.166172°	15.653259°	16	03.03.2020	Gallico Inferiore	Reggio Calabria	RC	climbed to a wire mesh and and on the wall of an old house	Roadside	REGGIO
29	Salpichroa origanifolia (Lam.) Baill.	INV	change of status Calabria	[79]	V.L.A. Laface	V.L.A. Laface	557158.53 m E	4224417.36 m N	38.165846°	15.652497°	14	03.03.2020	Gallico Inferiore	Reggio Calabria	RC	climbed to a wire mesh and grow in uncultivated garden	Roadside	REGGIO
29	Salpichroa origanifolia (Lam.) Baill.	INV	change of status Calabria	[79]	V.L.A. Laface	V.L.A. Laface	556976.71 m E	4224297.44 m N	38.164773°	15.650404°	9	03.03.2020	Gallico Inferiore	Reggio Calabria	RC	climbed to a wire mesh and grow in uncultivated garden	Roadside	REGGIO
29	Salpichroa origanifolia (Lam.) Baill.	INV	change of status Calabria	[79]	V.L.A. Laface	V.L.A. Laface	557580.25 m E	4223381.18 m N	38.156481°	15.657227°	18	03.03.2020	Fiumara Scaccioti	Reggio Calabria	RC	climbing on the bridge	Roadside	REGGIO
29	Salpichroa origanifolia (Lam.) Baill.	INV	change of status Calabria	[79]	V.L.A. Laface	V.L.A. Laface	556922.44 m E	4225341.91 m N	38.174193°	15.649876°	27	04.03.2020	Catona	Reggio Calabria	RC	roadside, climbed to a wire mesh	Roadside	REGGIO
29	Salpichroa origanifolia (Lam.) Baill.	INV	change of status Calabria	[79]	V.L.A. Laface	V.L.A. Laface	555672.07 m E	4227595.87 m N	38.194584°	15.635778°	5	10.02.2020	Spontone	Reggio Calabria	RC	roadside, climbed to a wire mesh	Roadside
29	Salpichroa origanifolia (Lam.) Baill.	INV	change of status Calabria	[79]	V.L.A. Laface	V.L.A. Laface	555756.63 m E	4227740.18 m N	38.195878°	15.636748°	15	17.01.2020	Bolano, tra Catona e Villa S.Giovanni	Reggio Calabria	RC	roadside, climbed to a wire mesh	Roadside
29	Salpichroa origanifolia (Lam.) Baill.	INV	change of status Calabria	[79]	V.L.A. Laface	V.L.A. Laface	558266.98 m E	4219567.09 m N	38.122064°	15.664753°	59	05.01.2020	Reggio Calabria	Reggio Calabria	RC	roadside, climbed to a wire mesh	Roadside	REGGIO
29	Salpichroa origanifolia (Lam.) Baill.	INV	change of status Calabria	[79]	V.L.A. Laface	V.L.A. Laface	555613.88 m E	4227380.24 m N	38.192642°	15.635087°	4	10.02.2020	Marinella di Catona	Reggio Calabria	RC	roadside, climbed to a wire mesh	Roadside
30	Sesbania punicea (Cav.) Benth.	INV	change of status Calabria	[79]	C.M. Musarella	C.M. Musarella	608572.32 m E	4307634.44 m N	38.910900°	16.252251°	9	21.08.2019	Aereoporto Internazionale di Lamezia Terme	Lamezia Terme	CZ	in a water drainagechannel near the airport, between the way and a cultivated field	Temporary water body	REGGIO
31	Solanum tuberosum L.	CAS	new Calabria	[79]	V.L.A. Laface	V.L.A. Laface	560857.81 m E	4225985.58 m N	38.179731°	15.694848°	299	11.01.2020	Sambatello (incrocio tra Via 25 Luglio e S.P.7)	Reggio Calabria	RC	roadside, water drainage channel	Temporary water body	REGGIO
32	Tecoma stans (L.) Juss. ex Kunth	CAS	new Europe	[77]	V.L.A. Laface	V.L.A. Laface	557235.91 m E	4204610.64 m N	37.987339°	15.651794°	12	19.10.2019	Svincolo Bocale - S.S.106	Reggio Calabria	RC	Sidewalk	Sidewalk	REGGIO
33	Tradescantia sillamontana Matuda	CAS	new Calabria	[79]	V.L.A. Laface	V.L.A. Laface	581078.41 m E	4199019.37 m N	37.935131°	15.922646°	76	01.12.2019	C.da Monte Callea	Bova	RC	uncultivated field	Uncultivated field
34	Washingtonia filifera (Linden ex André) H.Wendl. ex de Bary	CAS	new Calabria	[79]	V.L.A. Laface	V.L.A. Laface	558426.17 m E	4219344.50 m N	38.120043°	15.666549°	85	10.01.2020	Fiumara lungo la starda tra Agraria ed Ingegneria	Reggio Calabria	RC	Sidewalk	Sidewalk	REGGIO
Note. C= Casual; N= Naturalized; I= Invasive. RC= Reggio Calabria; CZ= Catanzaro.
